# Supplementary material for: Biohydrogen and Bioethanol Production from Biodiesel-Based Glycerol by Enterobacter aerogenes in a Continuous Stir Tank Reactor
Source: PubMed Central journal article supplement (PMC4463667; doi:10.3390/ijms160510650), 2015-05-11
Supplement: ijms-16-10650-s001.pdf [file ijms-16-10650-s001.pdf]

## Supplementary Information

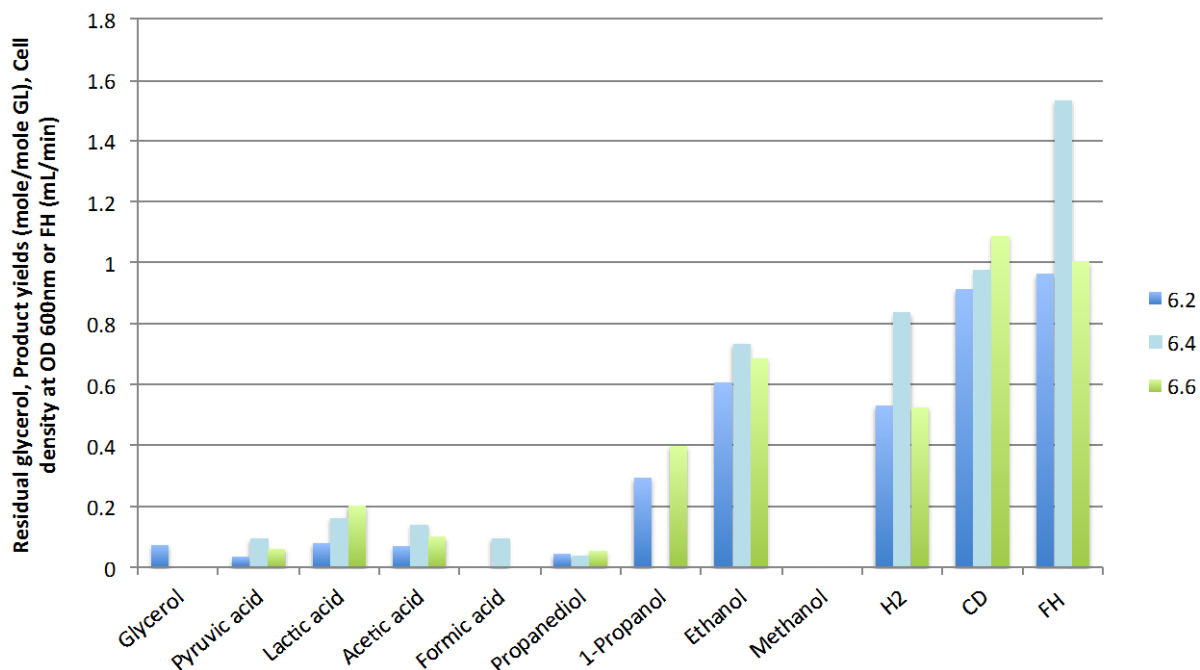

**Figure S1.** Effect of pH on residual glycerol, hydrogen, ethanol and other product yields, cell density, and rate of hydrogen production (FH) (3 replicates).

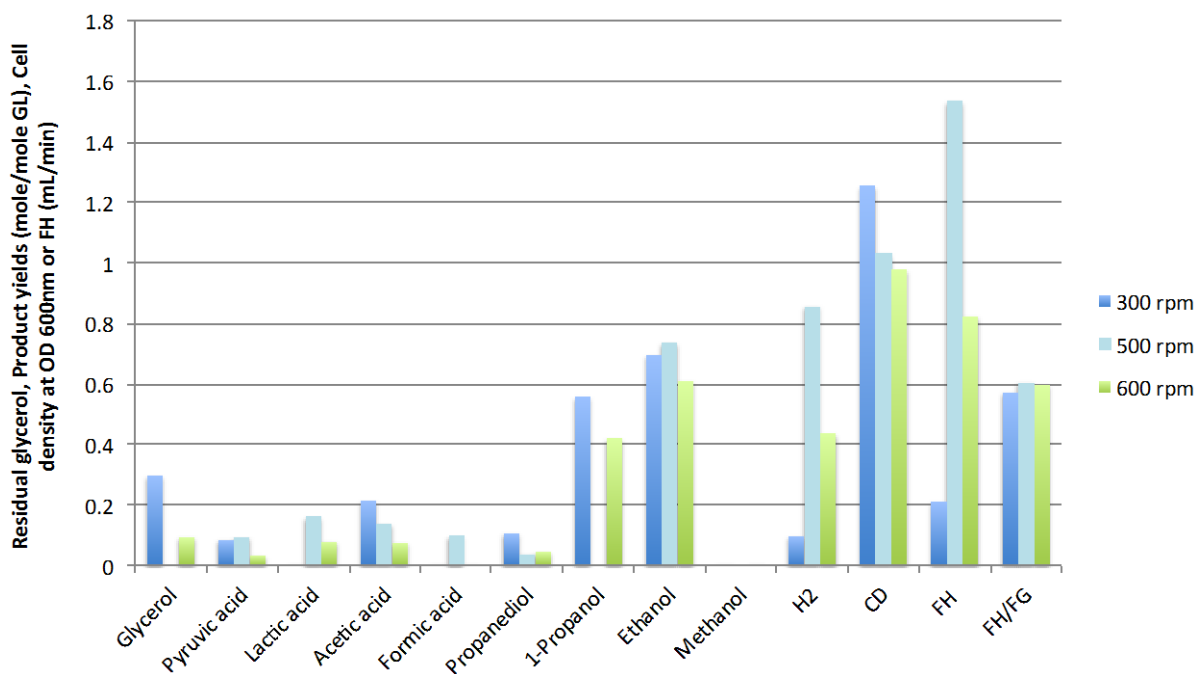

**Figure S2.** Effect of mixing speed on residual glycerol, hydrogen, ethanol and other product yields, cell density and rate of hydrogen production (FH) (3 replicates).

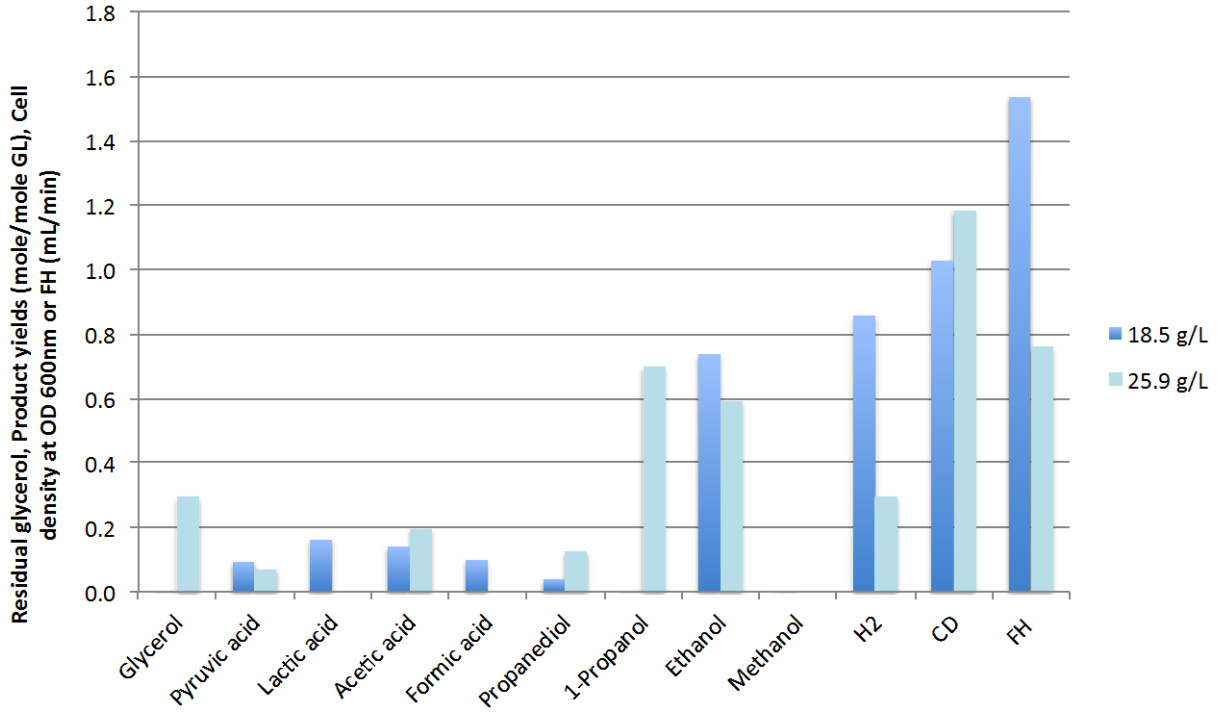

**Figure S3.** Effect of glycerol concentration on residual glycerol, hydrogen, ethanol and other product yields, cell density and rate of hydrogen production (FH) (3 replicates).

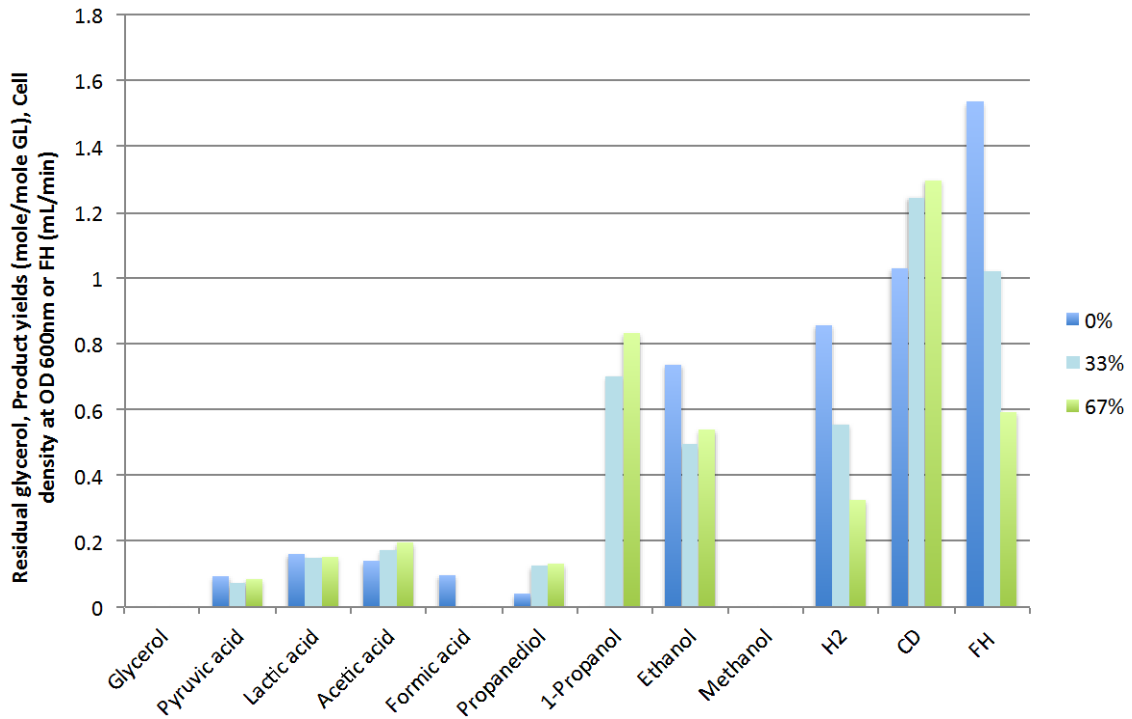

**Figure S4.** Effect of waste recycling on residual glycerol, hydrogen, ethanol and other product yields, cell density and rate of hydrogen production (FH) (3 replicates).
